# Supplementary material for: Trends of Adherence to the Mediterranean Dietary Pattern in Northern Italy from 2010 to 2016
Source: Nutrients. 2017 Jul 11;9(7):734. doi: 10.3390/nu9070734 (PMC5537848; doi:10.3390/nu9070734)
Supplement: Supplementary file 1 [file nutrients-09-00734-s001.pdf]

|                          |             |             |             |             |             |             |             |             |             |             |             |             |             |             |             |
|--------------------------|-------------|-------------|-------------|-------------|-------------|-------------|-------------|-------------|-------------|-------------|-------------|-------------|-------------|-------------|-------------|
| Non-worker               | 0.15        | 0.96        | 0.33        | 0.59        | 0.14        | 0.69        | 0.97        | 0.86        | 0.29        | 0.05        | 0.09        | 0.64        | 0.17        | 0.62        | 0.42        |
|                          | [0.14,0.17] | [0.95,0.97] | [0.31,0.36] | [0.57,0.62] | [0.12,0.16] | [0.67,0.71] | [0.96,0.98] | [0.85,0.88] | [0.27,0.32] | [0.04,0.06] | [0.07,0.10] | [0.61,0.66] | [0.15,0.18] | [0.60,0.64] | [0.39,0.44] |
| Worker                   | 0.13        | 0.98        | 0.35        | 0.53        | 0.11        | 0.69        | 0.98        | 0.84        | 0.31        | 0.04        | 0.09        | 0.53        | 0.18        | 0.59        | 0.40        |
|                          | [0.13,0.14] | [0.97,0.98] | [0.34,0.36] | [0.52,0.55] | [0.10,0.12] | [0.67,0.70] | [0.97,0.98] | [0.83,0.85] | [0.30,0.32] | [0.04,0.05] | [0.08,0.10] | [0.52,0.54] | [0.17,0.19] | [0.58,0.61] | [0.38,0.41] |
| <b>Marital status</b>    |             |             |             |             |             |             |             |             |             |             |             |             |             |             |             |
| Single                   | 0.13        | 0.97        | 0.33        | 0.53        | 0.12        | 0.71        | 0.98        | 0.83        | 0.30        | 0.05        | 0.10        | 0.55        | 0.19        | 0.60        | 0.36        |
|                          | [0.12,0.14] | [0.97,0.98] | [0.31,0.34] | [0.52,0.55] | [0.11,0.13] | [0.69,0.72] | [0.98,0.98] | [0.82,0.85] | [0.29,0.32] | [0.04,0.06] | [0.09,0.11] | [0.53,0.56] | [0.17,0.20] | [0.58,0.61] | [0.34,0.37] |
| Married                  | 0.15        | 0.98        | 0.36        | 0.56        | 0.12        | 0.67        | 0.97        | 0.86        | 0.31        | 0.04        | 0.08        | 0.56        | 0.17        | 0.60        | 0.44        |
|                          | [0.14,0.16] | [0.97,0.98] | [0.35,0.38] | [0.54,0.57] | [0.11,0.13] | [0.66,0.68] | [0.97,0.98] | [0.85,0.87] | [0.30,0.32] | [0.04,0.05] | [0.07,0.09] | [0.55,0.57] | [0.16,0.18] | [0.59,0.62] | [0.42,0.45] |
| <b>Smoking</b>           |             |             |             |             |             |             |             |             |             |             |             |             |             |             |             |
| Non-smoker               | 0.13        | 0.97        | 0.33        | 0.55        | 0.13        | 0.69        | 0.98        | 0.85        | 0.26        | 0.05        | 0.09        | 0.53        | 0.17        | 0.62        | 0.40        |
|                          | [0.12,0.14] | [0.97,0.98] | [0.31,0.34] | [0.53,0.56] | [0.12,0.14] | [0.68,0.70] | [0.97,0.98] | [0.84,0.86] | [0.24,0.27] | [0.04,0.05] | [0.08,0.10] | [0.52,0.55] | [0.16,0.18] | [0.61,0.64] | [0.38,0.41] |
| Smoker                   | 0.14        | 0.97        | 0.37        | 0.53        | 0.10        | 0.67        | 0.98        | 0.83        | 0.37        | 0.05        | 0.08        | 0.58        | 0.16        | 0.57        | 0.41        |
|                          | [0.12,0.15] | [0.97,0.98] | [0.34,0.39] | [0.50,0.55] | [0.09,0.11] | [0.65,0.69] | [0.97,0.98] | [0.81,0.85] | [0.35,0.39] | [0.04,0.05] | [0.07,0.09] | [0.55,0.60] | [0.15,0.18] | [0.55,0.59] | [0.38,0.43] |
| Ex-smoker                | 0.16        | 0.98        | 0.38        | 0.56        | 0.11        | 0.70        | 0.98        | 0.85        | 0.36        | 0.04        | 0.10        | 0.58        | 0.20        | 0.58        | 0.41        |
|                          | [0.15,0.18] | [0.97,0.99] | [0.35,0.40] | [0.54,0.58] | [0.10,0.12] | [0.68,0.72] | [0.97,0.99] | [0.84,0.87] | [0.34,0.38] | [0.03,0.05] | [0.09,0.11] | [0.56,0.61] | [0.18,0.22] | [0.56,0.60] | [0.39,0.43] |
| <b>Physical activity</b> |             |             |             |             |             |             |             |             |             |             |             |             |             |             |             |
| No                       | 0.12        | 0.97        | 0.36        | 0.51        | 0.11        | 0.67        | 0.97        | 0.83        | 0.30        | 0.04        | 0.07        | 0.53        | 0.15        | 0.58        | 0.41        |
|                          | [0.11,0.13] | [0.97,0.98] | [0.35,0.37] | [0.49,0.52] | [0.10,0.12] | [0.66,0.68] | [0.97,0.98] | [0.82,0.84] | [0.29,0.32] | [0.04,0.05] | [0.07,0.08] | [0.52,0.54] | [0.14,0.16] | [0.56,0.59] | [0.40,0.43] |
| Yes                      | 0.16        | 0.97        | 0.33        | 0.60        | 0.13        | 0.71        | 0.98        | 0.87        | 0.31        | 0.05        | 0.11        | 0.59        | 0.20        | 0.63        | 0.38        |
|                          | [0.15,0.18] | [0.97,0.98] | [0.31,0.34] | [0.58,0.61] | [0.12,0.14] | [0.70,0.73] | [0.98,0.98] | [0.86,0.88] | [0.30,0.33] | [0.04,0.05] | [0.10,0.12] | [0.57,0.60] | [0.19,0.22] | [0.62,0.65] | [0.37,0.40] |

Values are marginal probabilities with 95% confidence intervals estimated for year of recruitment, sex, education, occupation, marital status, smoking status and physically activity level using the multivariable PWRM. Abbreviations: sp = spoons; d = day; s = servings; u=units; gl = glass; w = week; t = times.

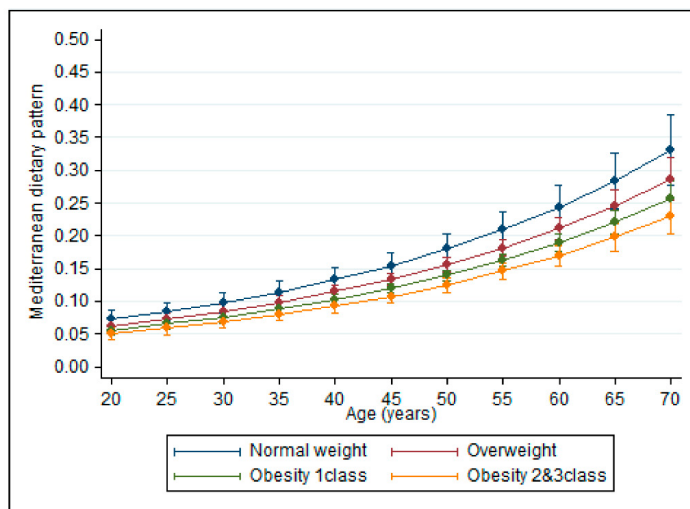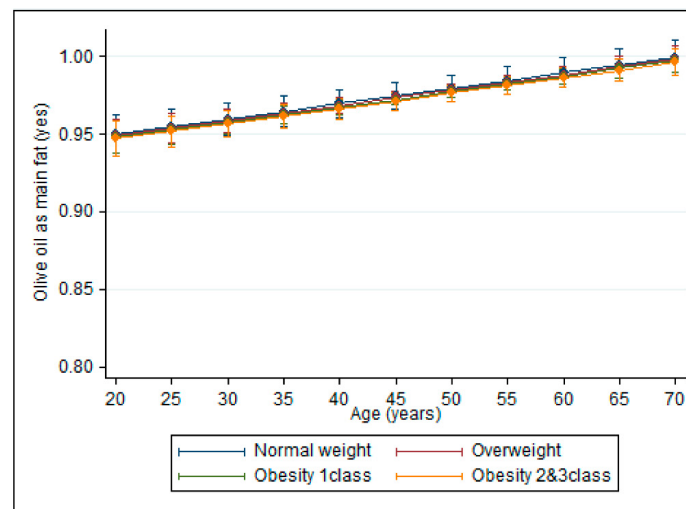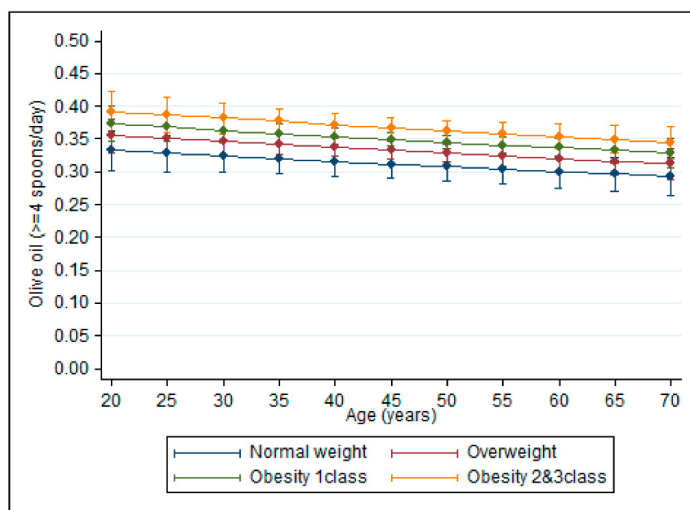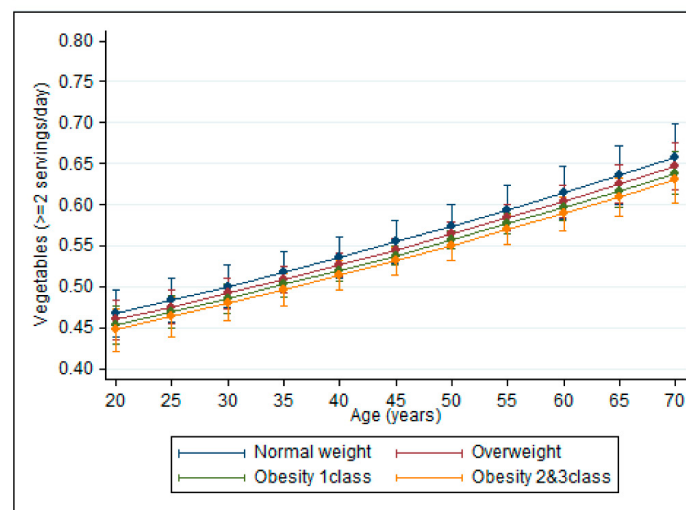

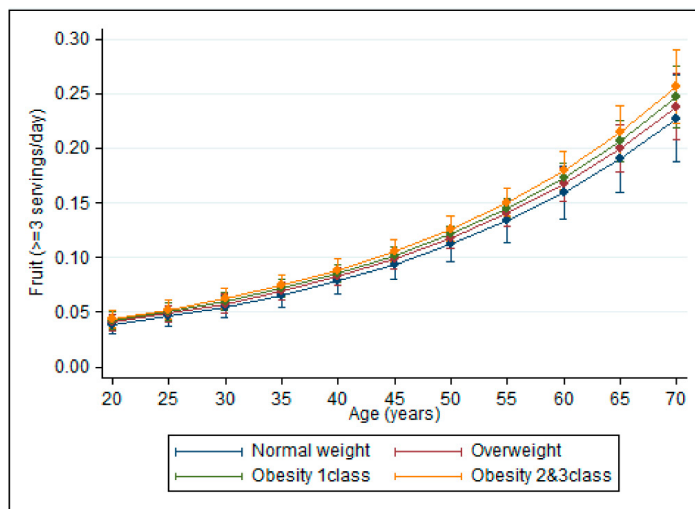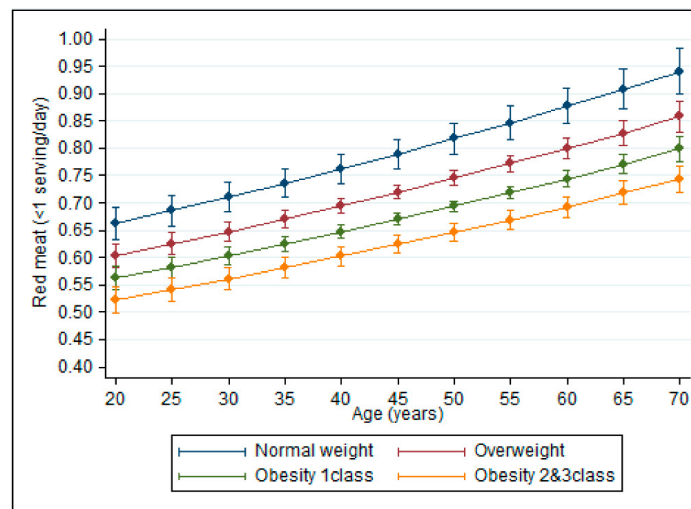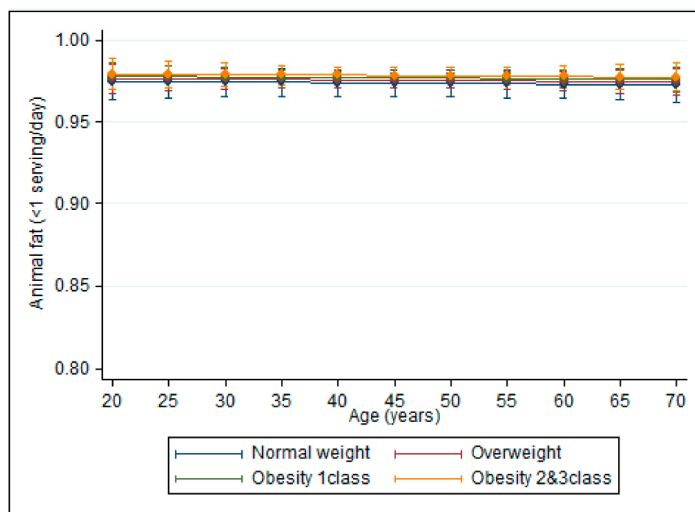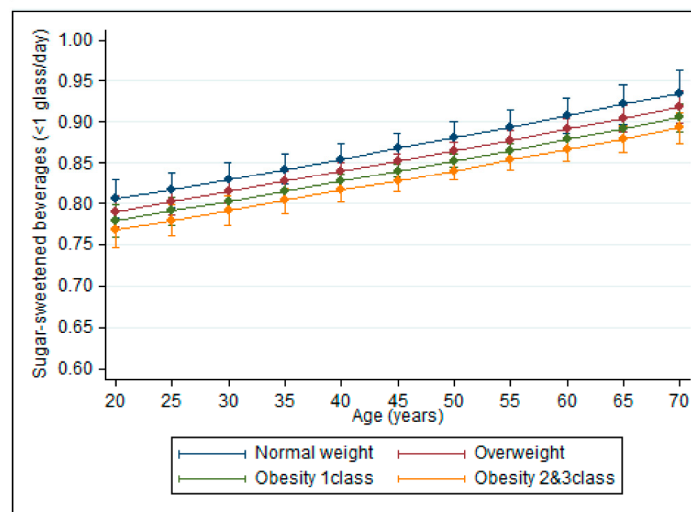

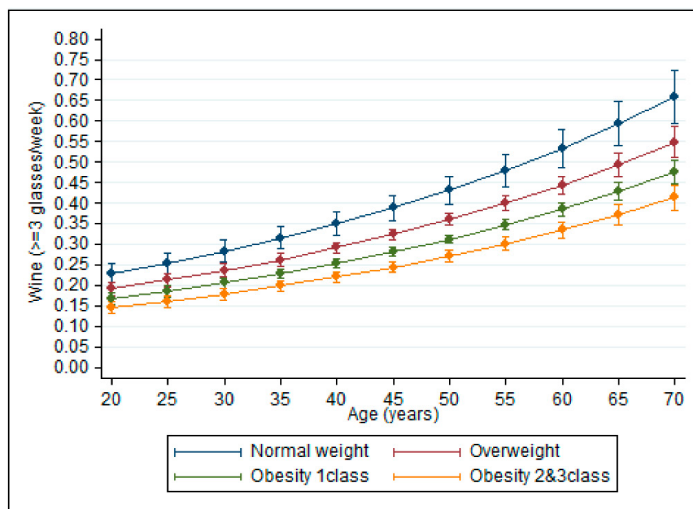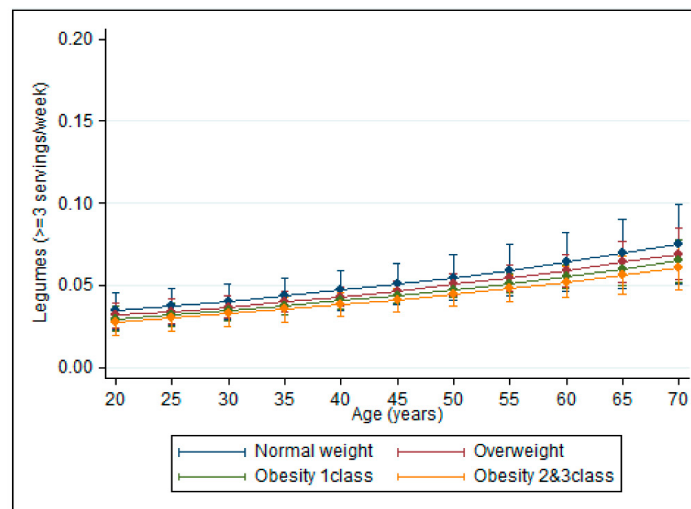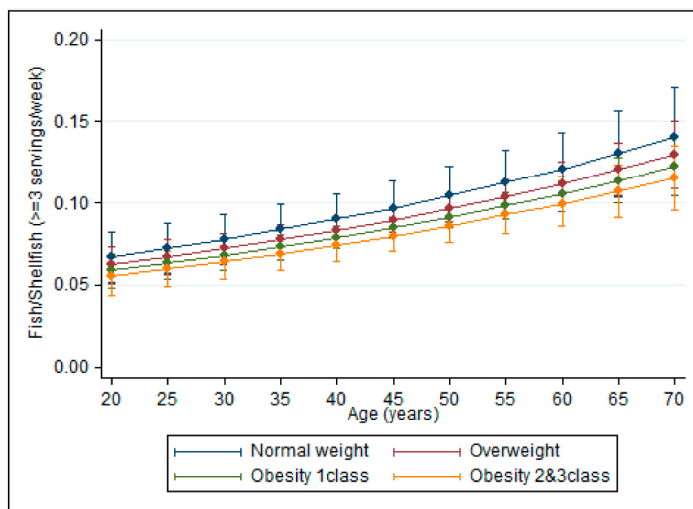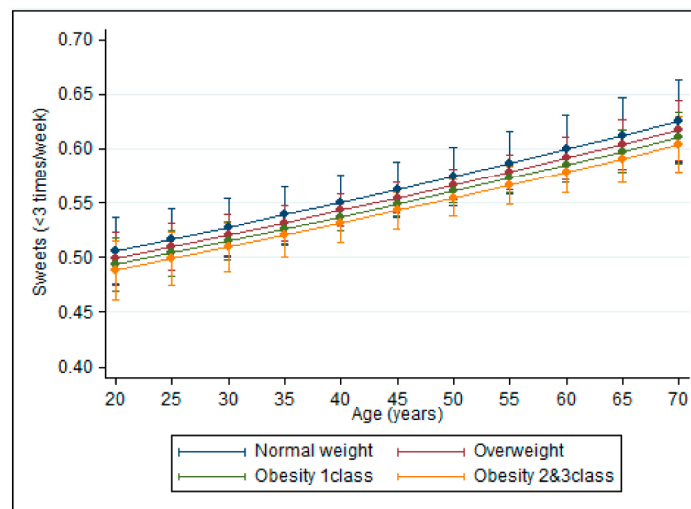

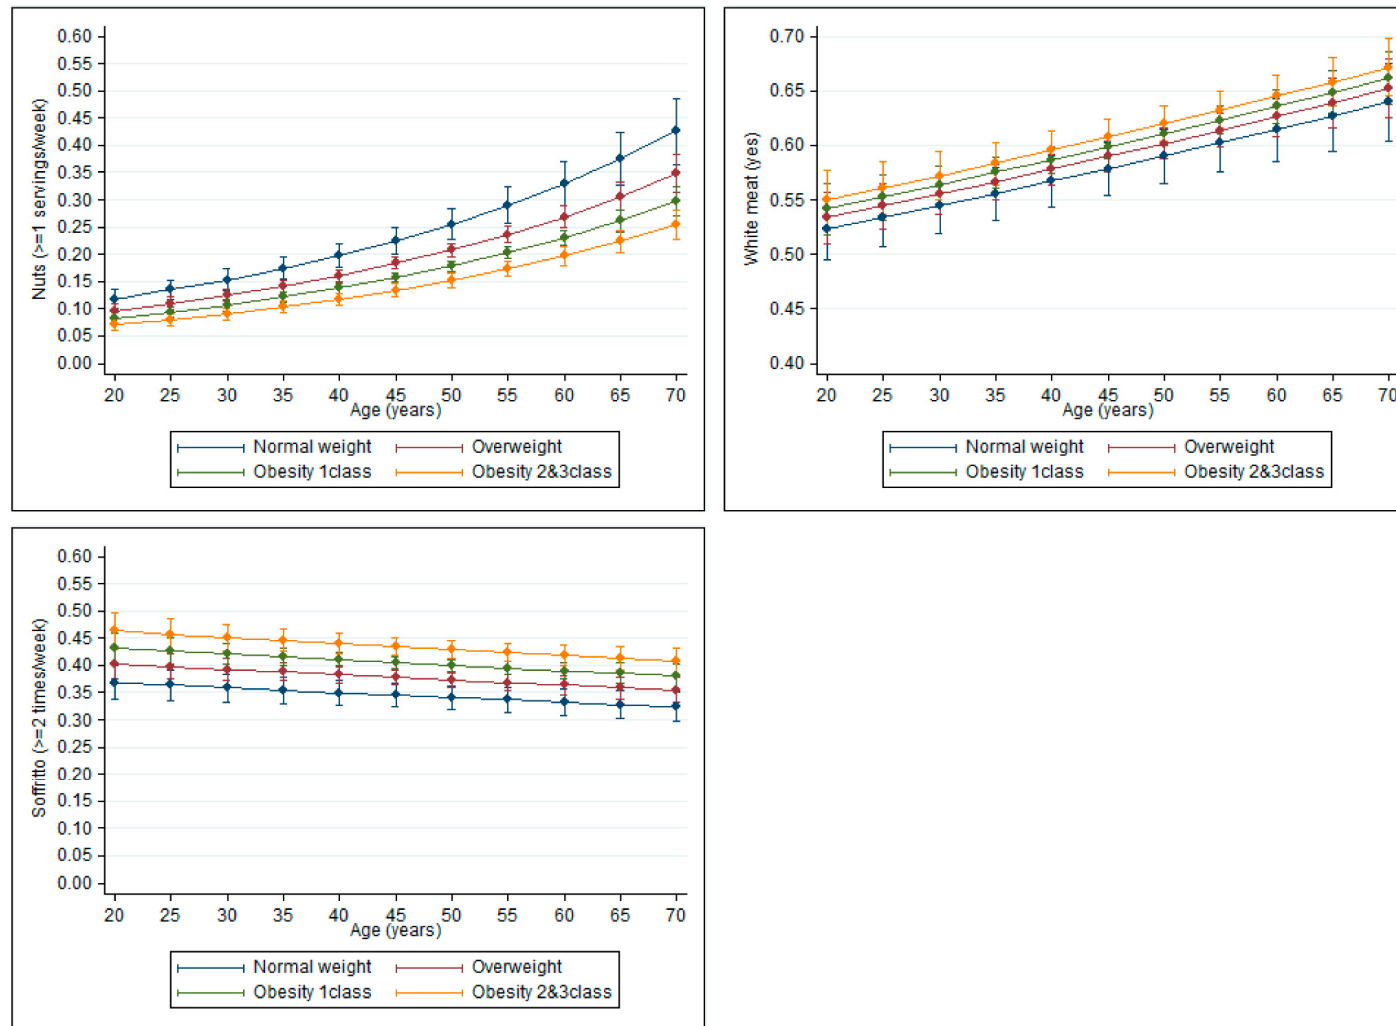

**Figure S1.** Marginal probabilities of adherence to the Mediterranean dietary pattern and its individual components as a function of age and nutritional status. The estimated probabilities were obtained using Poisson working regression models adjusted for socio-demographic characteristics, nutritional status, lifestyle variables and year of recruitment (see statistical analysis section for details).
